# Supplementary material for: 1H-NMR-Based Metabonomics of the Protective Effect of Coptis chinensis and Berberine on Cinnabar-Induced Hepatotoxicity and Nephrotoxicity in Rats
Source: PubMed Central journal article supplement (PMC6150353; doi:10.3390/molecules22111855), 2017-11-02
Supplement: molecules-22-01855-s001.pdf [file molecules-22-01855-s001.pdf]

Table S1. The pathway analysis potential target metabolites

| Metabolic pathway                           | Total | Expected | Hits | Raw p    | -Log(p) | Holm adjust | FDR      | Impact  |
|---------------------------------------------|-------|----------|------|----------|---------|-------------|----------|---------|
| Citrate cycle (TCA cycle)                   | 20    | 0.22825  | 4    | 4.93E-05 | 9.9185  | 0.00399     | 0.00399  | 0.17794 |
| Alanine, aspartate and glutamate metabolism | 24    | 0.27389  | 4    | 0.000105 | 9.1608  | 0.008406    | 0.004256 | 0.00316 |
| Glycine, serine and threonine metabolism    | 32    | 0.36519  | 4    | 0.000336 | 7.9973  | 0.026574    | 0.009082 | 0.29197 |
| Pyruvate metabolism                         | 22    | 0.25107  | 3    | 0.001647 | 6.4086  | 0.12849     | 0.033359 | 0.24337 |
| Glycolysis or Gluconeogenesis               | 26    | 0.29672  | 3    | 0.002704 | 5.9129  | 0.20824     | 0.043811 | 0.12753 |
| Methane metabolism                          | 9     | 0.10271  | 2    | 0.004198 | 5.4732  | 0.31903     | 0.056669 | 0       |
| Valine, leucine and isoleucine biosynthesis | 11    | 0.12553  | 2    | 0.006328 | 5.0628  | 0.47461     | 0.073226 | 0.33333 |
| Glyoxylate and dicarboxylate metabolism     | 16    | 0.1826   | 2    | 0.013354 | 4.3159  | 0.98822     | 0.13521  | 0.40741 |
| Butanoate metabolism                        | 20    | 0.22825  | 2    | 0.020589 | 3.883   | 1           | 0.1853   | 0       |
| Aminoacyl-tRNA biosynthesis                 | 67    | 0.76462  | 3    | 0.037374 | 3.2868  | 1           | 0.30273  | 0       |
| Cyanoamino acid metabolism                  | 6     | 0.068474 | 1    | 0.066665 | 2.7081  | 1           | 0.4909   | 0       |
| Taurine and hypotaurine metabolism          | 8     | 0.091298 | 1    | 0.087945 | 2.431   | 1           | 0.56939  | 0.42857 |
| Primary bile acid biosynthesis              | 46    | 0.52496  | 2    | 0.094426 | 2.3599  | 1           | 0.56939  | 0.05952 |
| Nitrogen metabolism                         | 9     | 0.10271  | 1    | 0.098413 | 2.3186  | 1           | 0.56939  | 0       |
| Selenoamino acid metabolism                 | 15    | 0.17118  | 1    | 0.1589   | 1.8395  | 1           | 0.80441  | 0       |

---

|                                            |    |         |   |         |         |   |         |         |
|--------------------------------------------|----|---------|---|---------|---------|---|---------|---------|
| Pantothenate and CoA biosynthesis          | 15 | 0.17118 | 1 | 0.1589  | 1.8395  | 1 | 0.80441 | 0       |
| Propanoate metabolism                      | 20 | 0.22825 | 1 | 0.20637 | 1.5781  | 1 | 0.98329 | 0       |
| Glutathione metabolism                     | 26 | 0.29672 | 1 | 0.26002 | 1.347   | 1 | 1       | 0.00573 |
| Porphyrin and chlorophyll metabolism       | 27 | 0.30813 | 1 | 0.26863 | 1.3144  | 1 | 1       | 0       |
| Cysteine and methionine metabolism         | 28 | 0.31954 | 1 | 0.27714 | 1.2832  | 1 | 1       | 0.02103 |
| Glycerophospholipid metabolism             | 30 | 0.34237 | 1 | 0.29388 | 1.2246  | 1 | 1       | 0.02315 |
| Valine, leucine and isoleucine degradation | 38 | 0.43367 | 1 | 0.35729 | 1.0292  | 1 | 1       | 0       |
| Tyrosine metabolism                        | 42 | 0.47932 | 1 | 0.38695 | 0.94947 | 1 | 1       | 0       |
| Arginine and proline metabolism            | 44 | 0.50214 | 1 | 0.40129 | 0.91306 | 1 | 1       | 0       |

---
